# Supplementary material
Source: publisher figshare collection journal article supplement (https://acs.figshare.com/ndownloader/files/27771777)
Supplement: Supplementary file 1 [file 27771777]

## Supporting Information

### Surface Pressure-Induced Inter-diffused Structure Evidenced by Neutron Reflectometry in Cellulose Acetate /Polybutadiene Langmuir films

Anne-Sophie Vaillard<sup>†</sup>, Alae El Haitami<sup>†,\*</sup>, Philippe Fontaine<sup>‡</sup>, Fabrice Cousin<sup>&</sup>, Philipp Gutfreund<sup>‡</sup>, Michel Goldmann<sup>‡,‡,‡</sup>, Sophie Cantin<sup>†</sup>

*CY Cergy Paris Université, F95000, Cergy, France, Synchrotron SOLEIL, L'Orme des Merisiers, Saint Aubin, BP48, 91192 Gif sur Yvette Cedex, France, Laboratoire Léon Brillouin, Université Paris-Saclay, CEA-CNRS UMR 12, F-91191 Gif-sur-Yvette, France, Institut Laue-Langevin, 71 Avenue des Martyrs, 38000 Grenoble, France, Institut des NanoSciences de Paris, Sorbonne Université, 4 Place Jussieu, 75252 Paris Cedex 05, France, Faculté des Sciences Fondamentales et Biomédicales, Université de Paris, 45 rue des Sts-Pères, 75006 Paris, France*

\* Corresponding author: e-mail: [alae.el-haitami@cyu.fr](mailto:alae.el-haitami@cyu.fr)

Phone number: +33.1.34.25.70.58

<sup>†</sup> CY Cergy Paris Université

<sup>‡</sup> Synchrotron SOLEIL

<sup>&</sup> Laboratoire Léon Brillouin

<sup>‡</sup> Institut Laue-Langevin

<sup>‡</sup> Institut des NanoSciences de Paris

<sup>‡</sup> Faculté des Sciences Fondamentales et Biomédicales

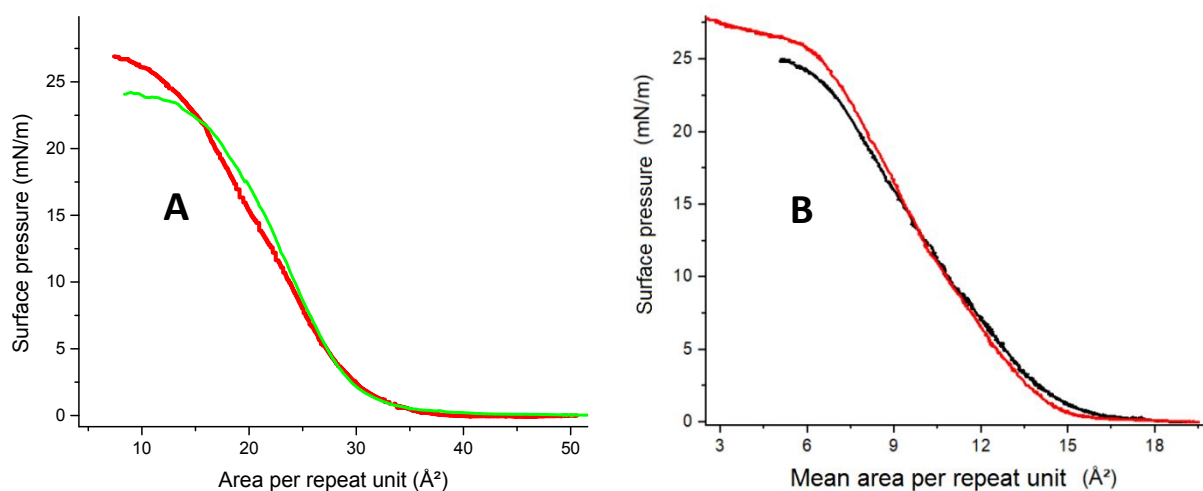

**Figure S1.** (A) Compression isotherms of CA monolayers over pure water. The two curves illustrate the reproducibility of the isotherms. (B) Compression isotherms of hydrogenated (black curve) and deuterated (red curve) PB monolayers at the air-water interface.

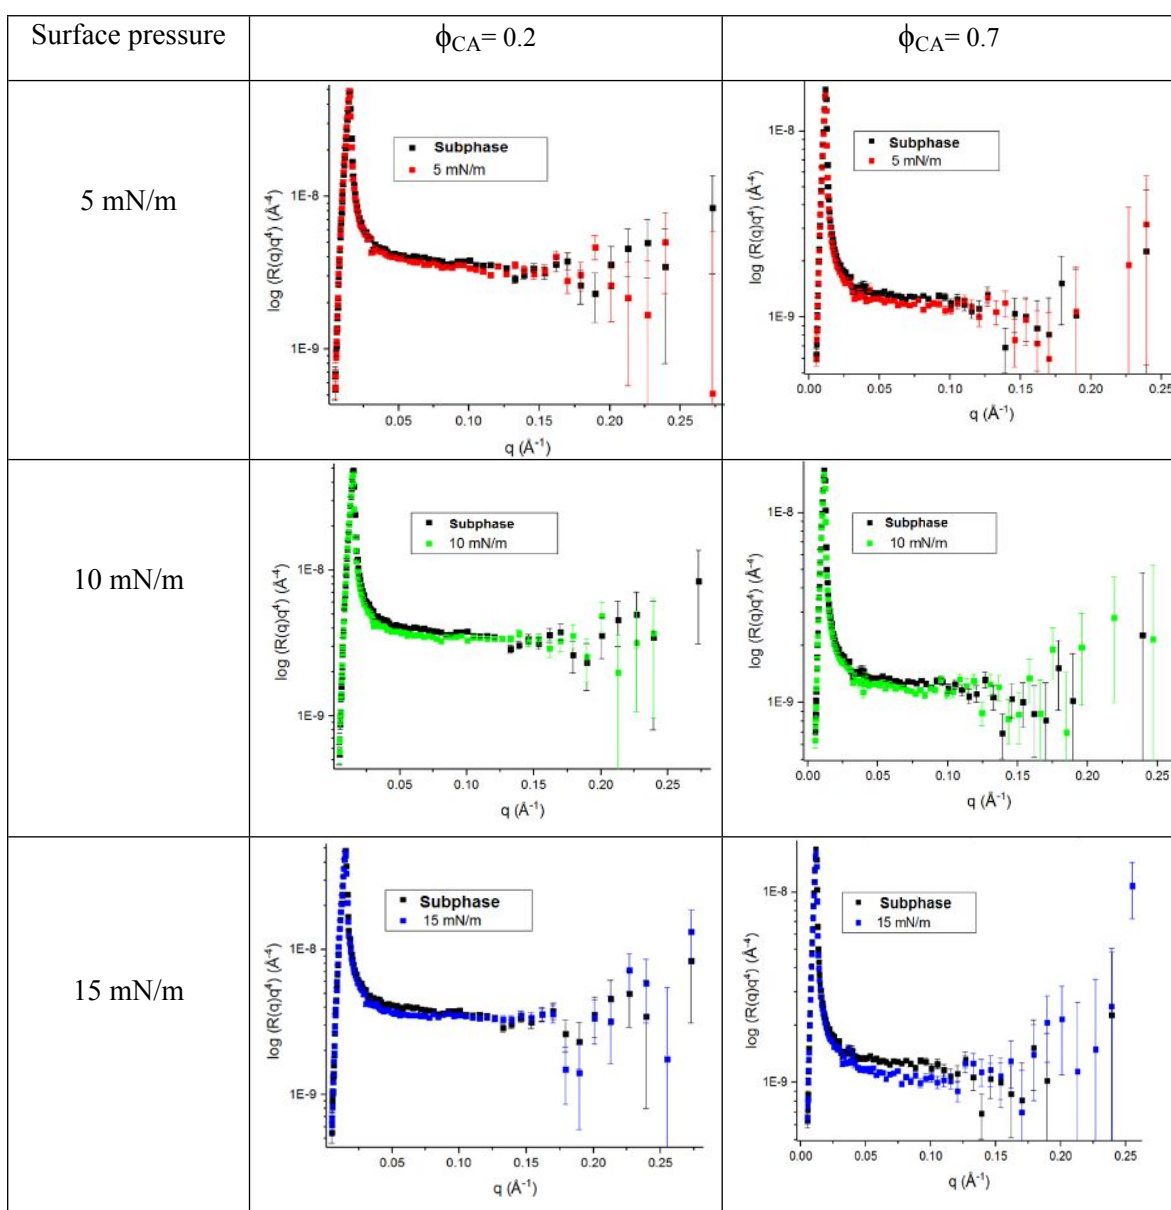

**Figure S2.** Neutron reflectivity curves for  $\phi_{CA} = 0.2$  and  $0.7$  CA/PBd Langmuir films at 5, 10 and 15 mN/m on  $D_2O/H_2O$  subphases matched to the homogeneous film. The subphase reflectivity is presented as a reference (black curves).

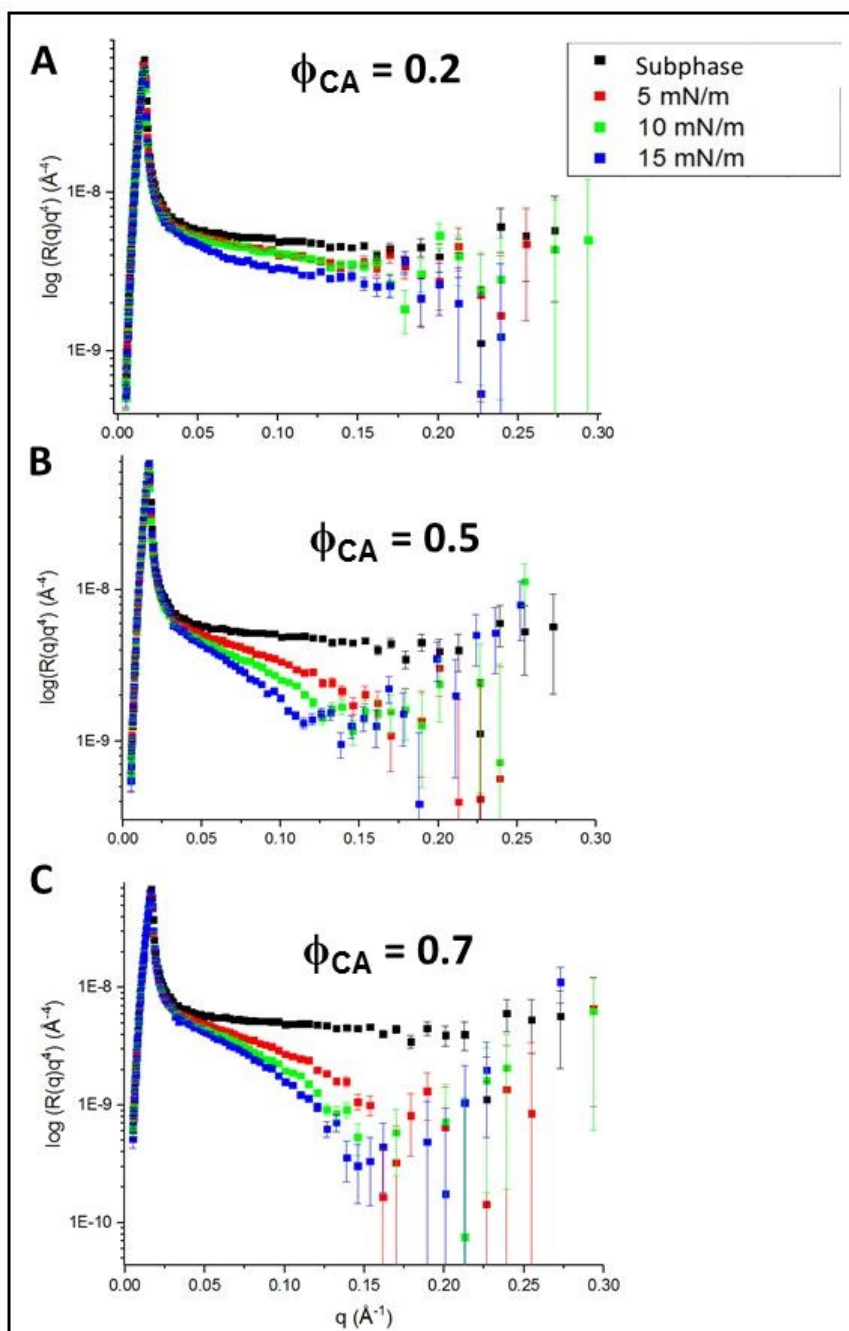

**Figure S3.** Neutron reflectivity curves for  $\phi_{CA} = 0.2$  (A), 0.5 (B) and 0.7 (C) CA/PBd Langmuir films on  $D_2O/H_2O$  subphases allowing contrast matched to PBd at 5, 10 and 15 mN/m. The subphase reflectivity curve is presented as a reference.

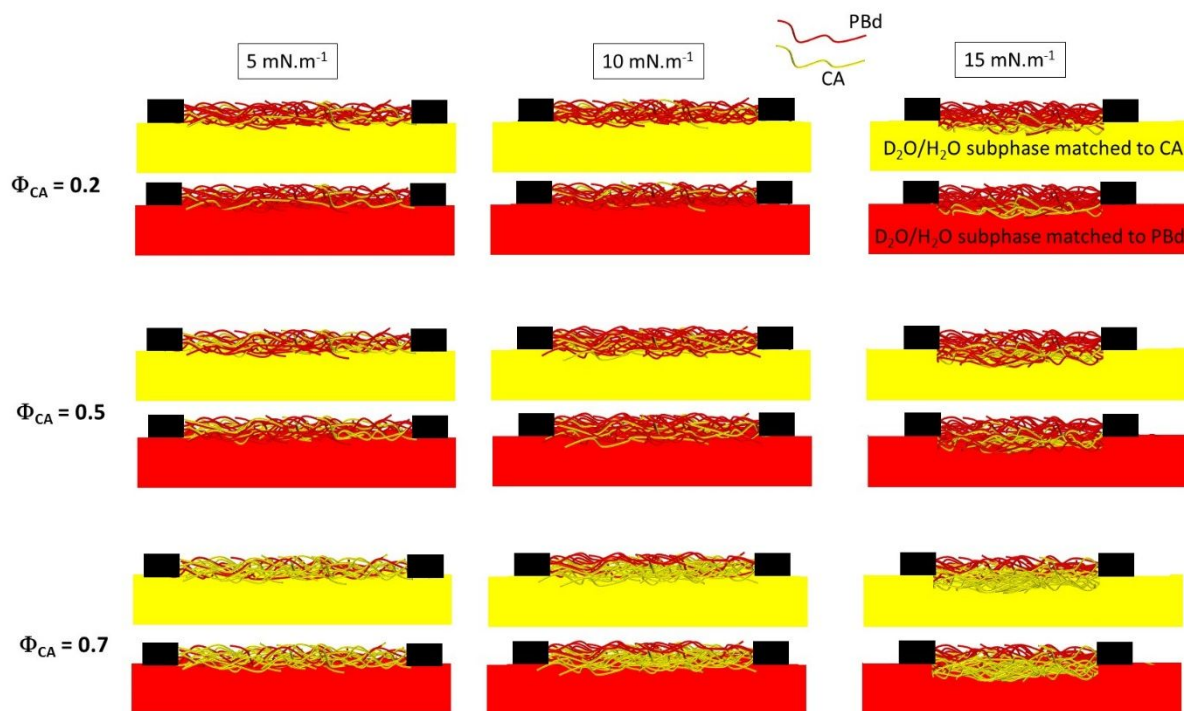

**Figure S4.** Schemes of the vertical structure of  $\phi_{CA} = 0.2, 0.5$  and  $0.7$  Langmuir films at 5, 10 and 15 mN/m, showing the strategy followed in neutron reflectivity measurements using contrast variation method through adequate isotopic substitution. Structures shown: red and yellow polymer chains correspond to PBd and CA, respectively. The water subphase is consisting of D<sub>2</sub>O/H<sub>2</sub>O mixtures allowing contrast-matching to either the PBd (red subphase) or the CA (yellow subphase).

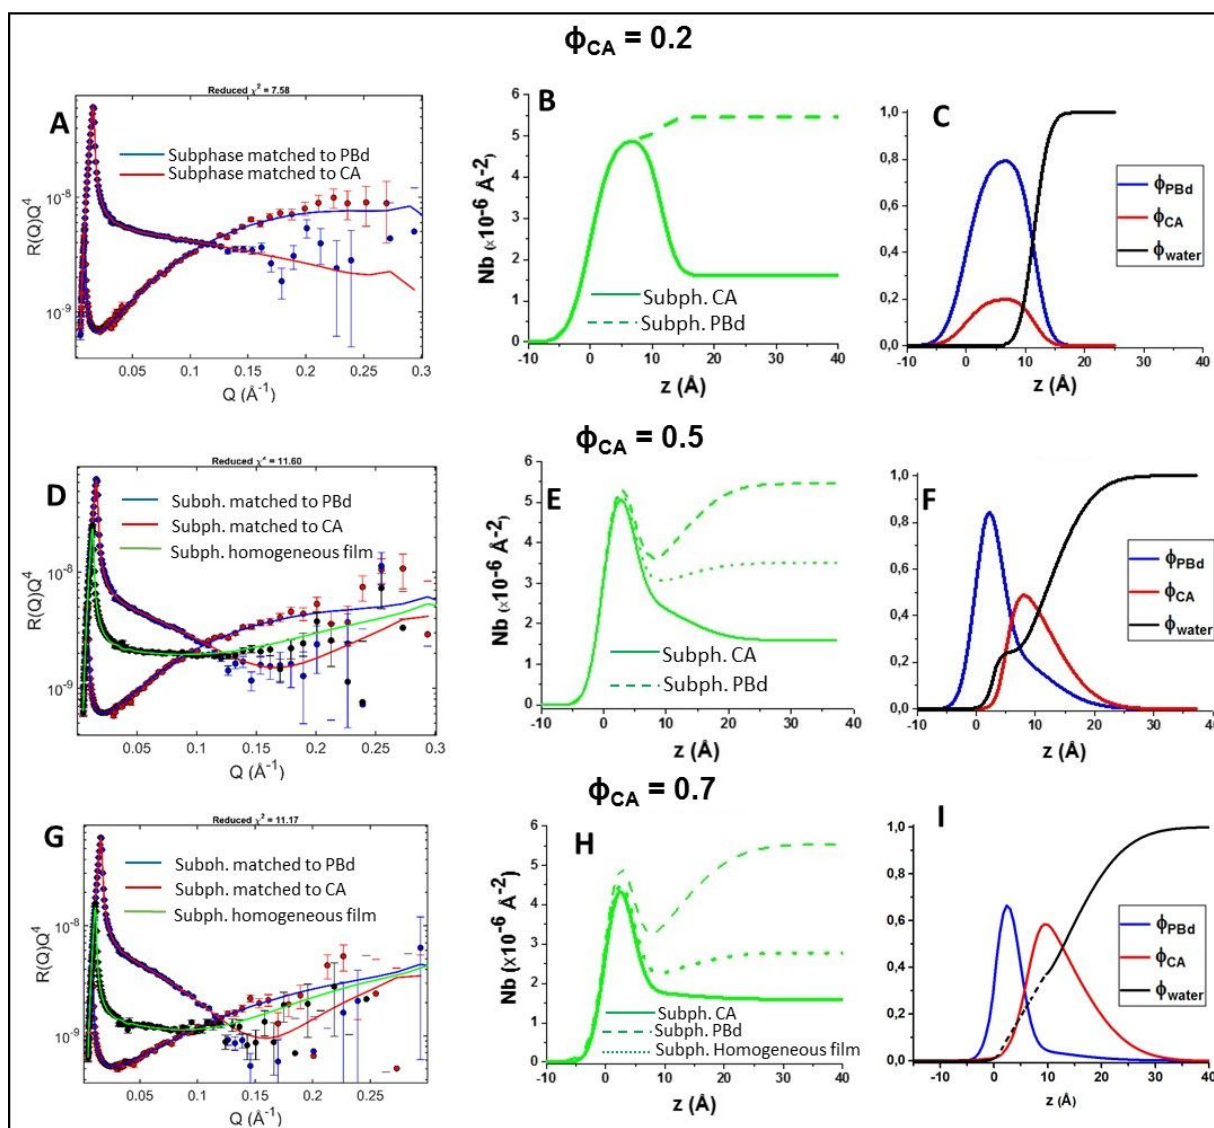

**Figure S5.** Fit of the reflectivity curves at 10 mN/m using simultaneously two (for  $\phi_{CA}=0.2$ , A) or three subphases (for  $\phi_{CA}=0.5$  and  $0.7$ ; D and G respectively) allowing contrast matched to CA, homogeneous film or PBd. SLD profiles as a function of depth and CA, PBd and water volume fractions depth profiles at 10 mN/m for  $\phi_{CA} = 0.2$  (B and C),  $0.5$  (E and F) and  $0.7$  (H and I) CA/PBd Langmuir films. The water volume fraction profile in the graph I corresponding to the  $\phi_{CA} = 0.7$  film at 10 mN/m was difficult to be precisely determined near the air-layer interface, thus it has been drawn in dashed lines.

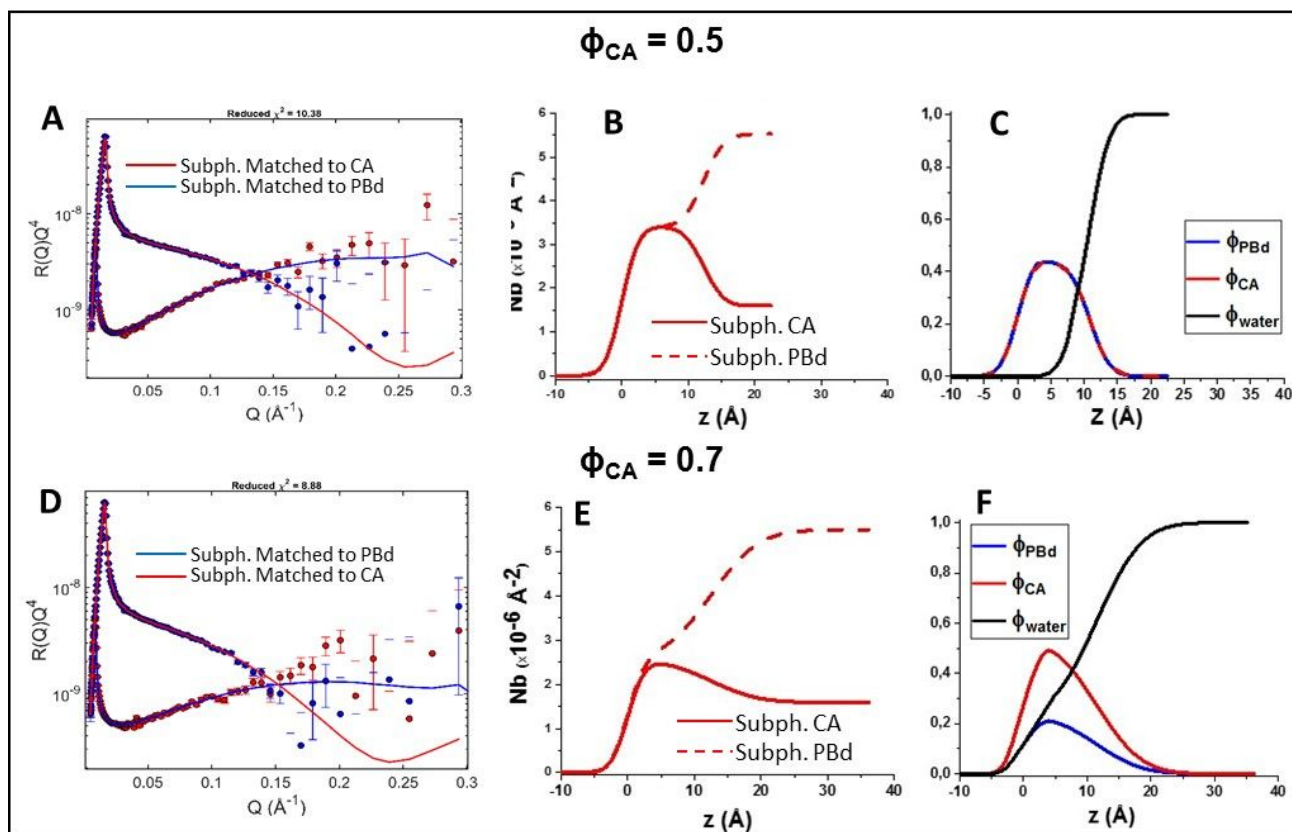

**Figure S6.** Fit of the reflectivity curves at 5 mN/m using simultaneously two subphases allowing contrast matched to CA and PBd for  $\phi_{CA}=0.5$  (A), 0.7 (D) CA/PBd mixed films. SLD profiles as a function of depth and CA, PBd and water volume fractions depth profiles for  $\phi_{CA} = 0.5$  (B and C) and 0.7 (E and F).
